# Supplementary material
Source: publisher figshare collection journal article supplement (https://frontiersin.figshare.com/ndownloader/files/18024335)
Supplement: Supplementary file [file 18024335]

**Supplementary Table 1. Clinical features of breast cancer patients.**

|                 | <b>Age</b> | <b>Gender</b> | <b>Tumor subtype</b> | <b>Pathological Stage</b> |
|-----------------|------------|---------------|----------------------|---------------------------|
| <b>Case #1</b>  | 43         | Female        | IDC                  | III                       |
| <b>Case #2</b>  | 59         | Female        | IDC                  | II                        |
| <b>Case #3</b>  | 53         | Female        | IDC                  | II                        |
| <b>Case #4</b>  | 39         | Female        | IDC                  | IIB                       |
| <b>Case #5</b>  | 63         | Female        | IDC                  | III                       |
| <b>Case #6</b>  | 46         | Female        | IDC                  | III                       |
| <b>Case #7</b>  | 54         | Female        | IDC                  | IIA                       |
| <b>Case #8</b>  | 45         | Female        | IDC                  | IA                        |
| <b>Case #9</b>  | 46         | Female        | IDC                  | III                       |
| <b>Case #10</b> | 39         | Female        | IDC                  | III                       |
| <b>Case #11</b> | 59         | Female        | IDC                  | IIB                       |
| <b>Case #12</b> | 62         | Female        | IDC                  | II                        |
| <b>Case #13</b> | 54         | Female        | IDC                  | II                        |
| <b>Case #14</b> | 57         | Female        | IDC                  | III                       |

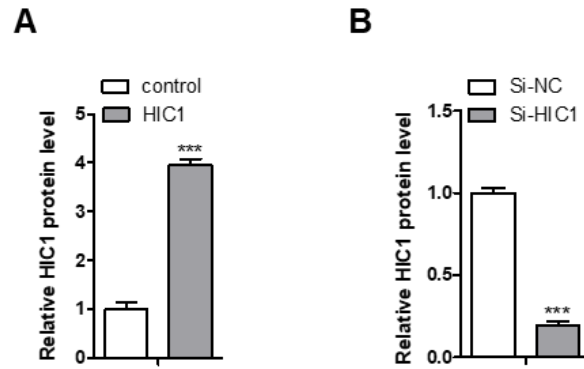

**Supplemental Fig.1** Western blot analysis of HIC1 level after the transfection of HIC1 overexpression vector (A) and HIC1 siRNA (B) in MCF-7. The results are presented as the mean  $\pm$  S.E. of three independent experiments. \*\*\*  $P < 0.001$ .

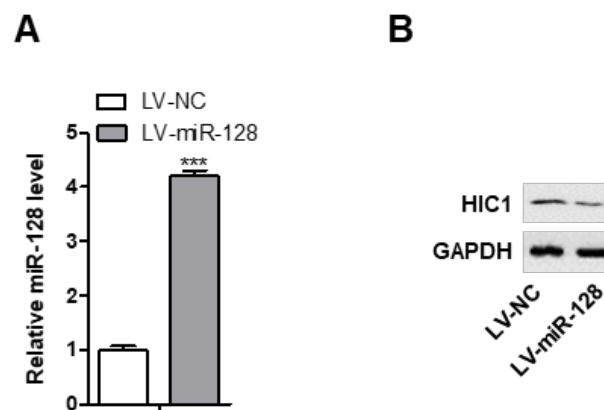

**Supplemental Fig.2 (A and B)** RT-PCR analysis of miR-128 level (A) and western blot analysis of HIC1 protein levels (B) in MCF-7 cells transfected with control lentiviral (LV-NC) or miR-128 lentiviral (LV-miR-128). The results are presented as the mean  $\pm$  S.E. of three independent experiments. \*\*\*  $P < 0.001$ .

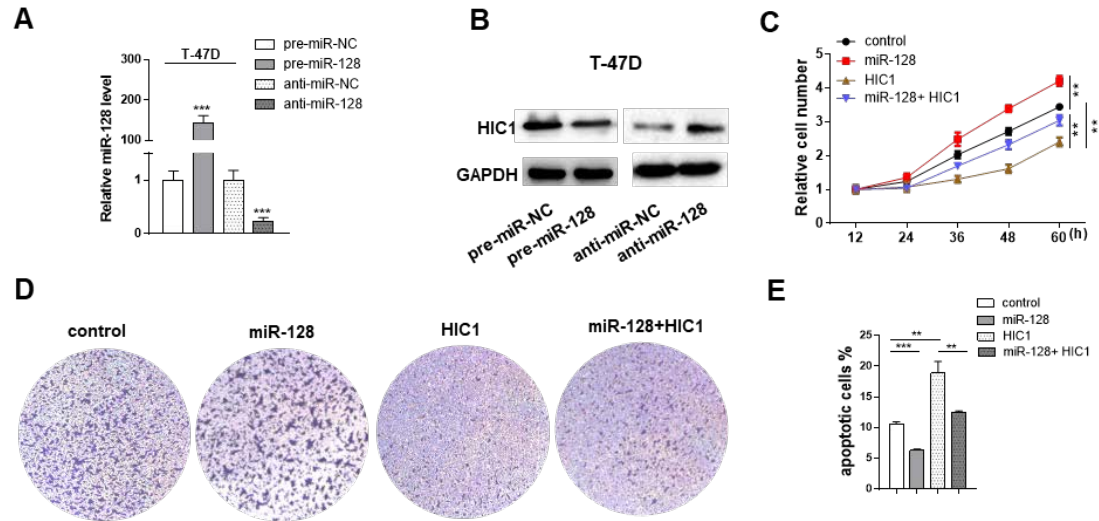

**Supplemental Fig.3 miR-128 directly targets HIC1 in T-47D cells.** (A) Quantitative RT-PCR analysis of miR-128 levels in T-47D cells transfected with miR-128 mimics, miR-128 inhibitors or scrambled negative control RNA (pre-miR-NC or anti-miR-NC). (B) Western blotting analysis of HIC1 protein levels in T-47D cells transfected with miR-128 mimic, miR-128 inhibitor or scrambled negative control RNA. (C-E) The proliferation, invasion and apoptosis assays were performed after transfecting with scrambled negative control RNA, miR-128 mimic, HIC1 vector or miR-128 mimic plus HIC1 vector. The results are presented as the mean  $\pm$  S.E. of three independent experiments. \*  $P < 0.05$ ; \*\*  $P < 0.01$ ; \*\*\*  $P < 0.001$ .
